# Supplementary material for: Spleen-Dependent Immune Protection Elicited by CpG Adjuvanted Reticulocyte-Derived Exosomes from Malaria Infection Is Associated with Changes in T cell Subsets' Distribution
Source: Front Cell Dev Biol. 2016 Nov 16;4:131. doi: 10.3389/fcell.2016.00131 (PMC5110551; doi:10.3389/fcell.2016.00131)
Supplement: Dataset S1 — List of mouse proteins detected by MS/MS. [file DataSheet1.XLS]

## Sheet: Mus musculus
Uniprot ID	MGI ID	description	gene	Peptides - Pool1	Peptides - Pool2	Peptides - Pool3	Peptides - Pool4	Count @ 2pep	Count @ 1pep	Exosomal/Rex Markers	CORE Proteome
D3YTT7	NA	40S ribosomal protein SA	RPSA-PS10	3	9	2	4	4	4		X
P01942	96015	Hemoglobin subunit alpha	HBA	3	9	8	7	4	4		X
P02088	96021	Hemoglobin subunit beta-1	HBB-B1	8	14	13	12	4	4		X
P02089	96022	Hemoglobin subunit beta-2	HBB-B2	9	14	11	11	4	4		X
P58252	95288	Elongation factor 2	EEF2	8	38	14	6	4	4		X
Q62351	98822	Transferrin receptor protein 1	TFRC	6	21	8	21	4	4	X	X
E9PUZ0	3036248	Protein Apol11b	APOL11B		4	2	2	3	3		X
E9Q1Y3	88052	Apolipoprotein B-100 (Fragment)	APOB		4	4	3	3	3		X
P07901	96250	Heat shock protein HSP 90-alpha	HSP90AA1	8	26	8		3	3		X
P10518	96853	Delta-aminolevulinic acid dehydratase	ALAD	2	17	9	1	3	4		X
P17182	95393	Alpha-enolase	ENO1	4	7	3		3	3		X
P24270	88271	Catalase	CAT	2	25	5		3	3		X
P24549	1353450	Retinal dehydrogenase 1	ALDH1A1	4	14	2		3	3		X
P62827	1333112	GTP-binding nuclear protein Ran	RAN	2	9	4		3	3		X
P63017	105384	Heat shock cognate 71 kDa protein	HSPA8	11	24		6	3	3	X	X
P68040	101849	Guanine nucleotide-binding protein subunit beta-2-like 1	GNB2L1	6	13	2		3	3		X
P68368	1095410	Tubulin alpha-4A chain	TUBA4A	5	18	8	1	3	4		X
P70697	98916	Uroporphyrinogen decarboxylase	UROD	3	18	7		3	3		X
P80314	107186	T-complex protein 1 subunit beta	CCT2	3	27	6		3	3		X
P80315	104689	T-complex protein 1 subunit delta	CCT4	4	18	5		3	3		X
P80316	107185	T-complex protein 1 subunit epsilon	CCT5	4	21	7		3	3		X
P80317	107943	T-complex protein 1 subunit zeta	CCT6A	2	17	7	1	3	4		X
P99024	107812	Tubulin beta-5 chain	TUBB5	5	23	9		3	3		X
Q02053	98890	Ubiquitin-like modifier-activating enzyme 1	UBA1	3	21	5		3	3		X
Q6ZPJ3	2444266	Ubiquitin-conjugating enzyme E2 O	UBE2O	3	28	3		3	3		X
Q8QZY1	2386251	Eukaryotic translation initiation factor 3 subunit L	EIF3L	2	13	5		3	3		X
Q9D020-1	NA	Isoform 1 of Cytosolic 5p-nucleotidase 3A	NT5C3A	4	17	3		3	3		X
Q9D8N0	1914410	Elongation factor 1-gamma	EEF1G	4	16	4		3	3		X
Q9EPK7-2	NA	Isoform 2 of Exportin-7	XPO7	4	25	8	1	3	4		X
Q9Z1Q9	90675	Valine--tRNA ligase	VARS	5	38	8		3	3		X
D3YYM6	1097682	40S ribosomal protein S5 (Fragment)	RPS5	1	2		2	2	3		X
D3Z659	NA	Uncharacterized protein	RPS2-PS6	1	3		2	2	3		X
E9Q133	104708	T-complex protein 1 subunit gamma	CCT3	2		6		2	2		X
E9Q5F6	98889	Polyubiquitin-C (Fragment)	UBC	1		2	2	2	3		X
F8WIX8	3646032	Histone H2A	HIST1H2AL		3	1	2	2	3		X
P00920	88269	Carbonic anhydrase 2	CA2		2		2	2	2		X
P04919-2	NA	Isoform Kidney of Band 3 anion transport protein	SLC4A1		4		4	2	2		X
P05213	107804	Tubulin alpha-1B chain	TUBA1B	6	20			2	2		X
P07724	87991	Serum albumin	ALB	4	3			2	2		X
P07742	98180	Ribonucleoside-diphosphate reductase large subunit	RRM1		21	4		2	2		X
P08032	98385	Spectrin alpha chain, erythrocytic 1	SPTA1		28	8		2	2		X
P09528	95588	Ferritin heavy chain	FTH1		15	3		2	2		X
P10126	1096881	Elongation factor 1-alpha 1	EEF1A1		14	7		2	2	X	X
P11352	104887	Glutathione peroxidase 1	GPX1	2	2			2	2		X
P11499	96247	Heat shock protein HSP 90-beta	HSP90AB1	8	27			2	2		X
P11983	98535	T-complex protein 1 subunit alpha	TCP1		20	8		2	2		X
P15508	98387	Spectrin beta chain, erythrocytic	SPTB		12	6		2	2		X
P23116	95301	Eukaryotic translation initiation factor 3 subunit A	EIF3A		13	2		2	2		X
P26039	1099832	Talin-1	TLN1	1	22	5		2	3		X
P26638	102809	Serine--tRNA ligase, cytoplasmic	SARS	2	11	1		2	3		X
P29391	95589	Ferritin light chain 1	FTL1		14	5		2	2		X
P42932	107183	T-complex protein 1 subunit theta	CCT8	6	22			2	2		X
P46471	109555	26S protease regulatory subunit 7	PSMC2	2	9			2	2		X
P50247	87968	Adenosylhomocysteinase	AHCY	2	9			2	2		X
P50580	894684	Proliferation-associated protein 2G4	PA2G4		11	2		2	2		X
P60710	87904	Actin, cytoplasmic 1	ACTB		12	6		2	2	X	X
P61205	99432	ADP-ribosylation factor 3	ARF3		3	2		2	2		X
P62196	105047	26S protease regulatory subunit 8	PSMC5		10	3		2	2		X
P62908	1350917	40S ribosomal protein S3	RPS3	2	5			2	2		X
P62962	97549	Profilin-1	PFN1		5	2		2	2		X
P68372	1915472	Tubulin beta-4B chain	TUBB4B		23	11		2	2		X
P99026	1098257	Proteasome subunit beta type-4	PSMB4		8	4		2	2		X
P99027	1914436	60S acidic ribosomal protein P2	RPLP2	2	5			2	2		X
Q01853	99919	Transitional endoplasmic reticulum ATPase	VCP	4	34			2	2		X
Q3TRH2	1914247	26S proteasome non-ATPase regulatory subunit 12	PSMD12	2		2		2	2		X
Q5SVG5	1096368	AP-1 complex subunit beta-1	AP1B1		5	2		2	2		X
Q60692	1194912	Proteasome subunit beta type-6	PSMB6		7	2		2	2		X
Q61703	96619	Inter-alpha-trypsin inhibitor heavy chain H2	ITIH2		6	6		2	2		X
Q8BX70-2	NA	Isoform 2 of Vacuolar protein sorting-associated protein 13C	VPS13C		10	2		2	2		X
Q8CGP6	2448295	Histone H2A type 1-H	HIST1H2AH		3	1	2	2	3		X
Q8R146-2	NA	Isoform 2 of Acylamino-acid-releasing enzyme	APEH		17	4		2	2		X
Q8R1B4	1926966	Eukaryotic translation initiation factor 3 subunit C	EIF3C		3	2		2	2		X
Q921I1	98821	Serotransferrin	TF		4		2	2	2		X
Q9CZD3	2449057	Glycine--tRNA ligase	GARS		10	2		2	2		X
Q9DBK7	1349462	MCG18845, isoform CRA_d	UBA7	1	13	2		2	3		X
Q9EQK5	1925638	Major vault protein	MVP		14	4		2	2		X
Q9QZI9	1349457	Serine incorporator 3	SERINC3	2	2		1	2	3		X
A2A5N1	1891917	14-3-3 protein beta/alpha (Fragment)	YWHAB		2			1	1	X
A2AGN7	1098754	26S protease regulatory subunit 6A	PSMC3		6			1	1
A2AL34	1915615	Ras-related protein Rab-14	RAB14		2			1	1
A2AQ07	107814	Tubulin beta-1 chain	TUBB1		7			1	1
A3KG36	105979	Glucose-6-phosphate 1-dehydrogenase (Fragment)	G6PDX	2				1	1
B7ZCL8	105941	55 kDa erythrocyte membrane protein	MPP1	2		1		1	2
D3YUQ9	1913906	Elongation factor 1-delta (Fragment)	EEF1D	3				1	1
D3YVK1	95739	Glutamine synthetase (Fragment)	GLUL			2		1	1
D3YW98	1928344	Vacuolar protein sorting-associated protein 29	VPS29		2			1	1
D3YWF6	2147616	Ubiquitin thioesterase OTUB1	OTUB1		2			1	1
D3YX79	3647964	Proteasome subunit alpha type	GM8394			3		1	1
D3YXG6	1923959	Actin-related protein 2/3 complex subunit 2	ARPC2		2			1	1
D3YYV8	102854	60S ribosomal protein L5 (Fragment)	RPL5		3	1	1	1	3
D3Z0B9	1916998	Aldehyde dehydrogenase family 16 member A1	ALDH16A1		3			1	1
D3Z3N0	107846	Protein arginine N-methyltransferase 1	PRMT1		6			1	1
D3Z6C3	NA	40S ribosomal protein S3a	RPS3A2		1		4	1	2
D3Z6F5	88115	ATP synthase subunit alpha	ATP5A1		2			1	1
D3Z795	1860263	Proteasome assembly chaperone 1	PSMG1		3			1	1
D3Z7N2	1913906	Elongation factor 1-delta (Fragment)	EEF1D	3				1	1
D6RJ72	1917493	WD repeat-containing protein 61 (Fragment)	WDR61		2			1	1
E0CXB1	1347006	Proteasome subunit alpha type-6	PSMA6			3		1	1
E9PWY9	1913840	Phenylalanine--tRNA ligase alpha subunit	FARSA		2			1	1
E9PYI8	1928898	Ubiquitin carboxyl-terminal hydrolase	USP14		2			1	1
E9Q070	3644565	Uncharacterized protein	GM8730			2		1	1
E9Q0X0	1347060	Proteasome subunit alpha type (Fragment)	PSMA4			2		1	1
E9Q509	97604	Pyruvate kinase	PKLR		7			1	1
E9Q586	107745	Dynactin subunit 1	DCTN1		2			1	1
E9Q5F4	87904	Actin, cytoplasmic 1 (Fragment)	ACTB	4			1	1	2	X
E9Q5I9	1345192	26S proteasome non-ATPase regulatory subunit 13	PSMD13		4			1	1
E9QAX7	1339951	Exportin-2	CSE1L		2			1	1
E9QKZ2	1918944	Importin-9	IPO9		2			1	1
E9QN08	1913906	Elongation factor 1-delta (Fragment)	EEF1D			2		1	1
F6QTS1	1349414	COP9 signalosome complex subunit 4 (Fragment)	COPS4		2			1	1
F6RPJ9	96412	Insulin-degrading enzyme (Fragment)	IDE		2			1	1
F6WA09	894689	14-3-3 protein epsilon (Fragment)	YWHAE		2			1	1	X
F6ZFU0	1913906	Elongation factor 1-delta (Fragment)	EEF1D		8			1	1
F7CAT1	95543	Peptidyl-prolyl cis-trans isomerase (Fragment)	FKBP4		2			1	1
F7CJS8	1924096	40S ribosomal protein S9 (Fragment)	RPS9	1	3			1	2
F7D1P5	88024	Ankyrin-1 (Fragment)	ANK1		2			1	1
F7D5L2	1917715	Methylosome protein 50 (Fragment)	WDR77		2			1	1
G3UXL2	3779453	Protein Prps1l3	PRPS1L3		4	1		1	2
G3UZI2	1891690	Heterogeneous nuclear ribonucleoprotein Q	SYNCRIP				6	1	1
G3UZZ3	109547	Dynamin-2 (Fragment)	DNM2		5			1	1
G3X8Y3	1922088	N-alpha-acetyltransferase 15, NatA auxiliary subunit	NAA15		2			1	1
H3BJC6	95421	S-formylglutathione hydrolase (Fragment)	ESD			2		1	1
H3BJP2	95421	S-formylglutathione hydrolase (Fragment)	ESD	2				1	1
H3BK96	99894	Heterogeneous nuclear ribonucleoprotein K (Fragment)	HNRNPK		3			1	1
H3BL49	107183	T-complex protein 1 subunit theta	CCT8			7		1	1
H3BL56	106028	Rho-related GTP-binding protein RhoC	RHOC		3			1	1	X
J3QMV5	1860086	Cytokine receptor-like factor 3	CRLF3		3			1	1
J3QNR5	NA	Uncharacterized protein	TUBB4B-PS1	5				1	1
J3QP68	NA	Uncharacterized protein	GM4204	1	4			1	2
O08709	894320	Peroxiredoxin-6	PRDX6		3			1	1
O09061	104884	Proteasome subunit beta type-1	PSMB1		11	1		1	2
O09172	104995	Glutamate--cysteine ligase regulatory subunit	GCLM		3			1	1
O35593	1913284	26S proteasome non-ATPase regulatory subunit 14	PSMD14		2			1	1
O35598	109548	Disintegrin and metalloproteinase domain-containing protein 10	ADAM10		2			1	1
O35955	1096380	Proteasome subunit beta type-10	PSMB10		4			1	1
O55135	1196288	Eukaryotic translation initiation factor 6	EIF6		3			1	1
O55234	1194513	Proteasome subunit beta type-5	PSMB5		13			1	1
O70194	1933181	Eukaryotic translation initiation factor 3 subunit D	EIF3D		3	1		1	2
O70251	1929520	Elongation factor 1-beta	EEF1B	1	5			1	2
O70435	104883	Proteasome subunit alpha type-3	PSMA3		8	1		1	2
O88342	1337100	WD repeat-containing protein 1	WDR1		4			1	1
O88587-2	NA	Isoform Soluble of Catechol O-methyltransferase	COMT		4			1	1
P01872	96448	Ig mu chain C region secreted form	IGH-6		5			1	1
P01895-2	NA	Isoform 2 of H-2 class I histocompatibility antigen, alpha chain	H2-D1	1			2	1	2
P01900	95896	H-2 class I histocompatibility antigen, D-D alpha chain	H2-D1		7			1	1
P01902	95904	H-2 class I histocompatibility antigen, K-D alpha chain	H2-K1		4			1	1
P05064	87994	Fructose-bisphosphate aldolase A	ALDOA		3			1	1	X
P05202	95792	Aspartate aminotransferase, mitochondrial	GOT2		8			1	1
P06151	96759	L-lactate dehydrogenase A chain	LDHA		3			1	1
P08030	88061	Adenine phosphoribosyltransferase	APRT		5			1	1
P08113	98817	Endoplasmin	HSP90B1		3			1	1
P08249	97050	Malate dehydrogenase, mitochondrial	MDH2		8	1		1	2
P0C0S6	1888388	Histone H2A.Z	H2AFZ		3			1	1
P11983-2	NA	Isoform 2 of T-complex protein 1 subunit alpha	TCP1	3				1	1
P12382	97547	6-phosphofructokinase, liver type	PFKL		3			1	1
P14148	98073	60S ribosomal protein L7	RPL7				2	1	1
P14685	98858	26S proteasome non-ATPase regulatory subunit 3	PSMD3	1	8			1	2
P14869	1927636	60S acidic ribosomal protein P0	RPLP0		8			1	1
P15105	95739	Glutamine synthetase	GLUL		10			1	1
P15327	1098242	Bisphosphoglycerate mutase	BPGM		7			1	1
P16858	95640	Glyceraldehyde-3-phosphate dehydrogenase	GAPDH		10	1		1	2	X
P17426-2	NA	Isoform B of AP-2 complex subunit alpha-1	AP2A1		8			1	1
P17427	101920	AP-2 complex subunit alpha-2	AP2A2		13			1	1
P17742	97749	Peptidyl-prolyl cis-trans isomerase A	PPIA		5			1	1
P18760	101757	Cofilin-1	CFL1		2			1	1	X
P19096	95485	Fatty acid synthase	FASN	1	3	1		1	3	X
P19157	95865	Glutathione S-transferase P 1	GSTP1		3	1		1	2
P20029	95835	78 kDa glucose-regulated protein	HSPA5	2				1	1
P21981	98731	Protein-glutamine gamma-glutamyltransferase 2	TGM2		9			1	1
P22315	95513	Ferrochelatase, mitochondrial	FECH		4			1	1
P22907-2	NA	Isoform 2 of Porphobilinogen deaminase	HMBS		5		1	1	2
P23591	98857	GDP-L-fucose synthase	TSTA3		2			1	1
P24547	109367	Inosine-5p-monophosphate dehydrogenase 2	IMPDH2		2			1	1
P26516	1351511	26S proteasome non-ATPase regulatory subunit 7	PSMD7		4			1	1
P27612	104810	Phospholipase A-2-activating protein	PLAA		4			1	1
P27659	1351605	60S ribosomal protein L3	RPL3		2			1	1
P28063	1346527	Proteasome subunit beta type-8	PSMB8		7			1	1
P28076	1346526	Proteasome subunit beta type-9	PSMB9		6	1		1	2
P28271	87879	Cytoplasmic aconitate hydratase	ACO1		2			1	1
P28474	87929	Alcohol dehydrogenase class-3	ADH5		3			1	1
P31324	97760	cAMP-dependent protein kinase type II-beta regulatory subunit	PRKAR2B		3			1	1
P32921-2	NA	Isoform 2 of Tryptophan--tRNA ligase, cytoplasmic	WARS		2			1	1
P35441	98737	Thrombospondin-1	THBS1		5			1	1
P35980	98003	60S ribosomal protein L18	RPL18		3			1	1
P36552	104841	Coproporphyrinogen-III oxidase, mitochondrial	CPOX		8			1	1
P40142	105992	Transketolase	TKT		6			1	1
P45376	1353494	Aldose reductase	AKR1B1		4			1	1
P47857	97548	6-phosphofructokinase, muscle type	PFKM		2			1	1
P47955	1927099	60S acidic ribosomal protein P1	RPLP1		2			1	1
P49222	95402	Erythrocyte membrane protein band 4.2	EPB42		2			1	1
P49722	104885	Proteasome subunit alpha type-2	PSMA2		6	1		1	2
P50516-2	NA	Isoform 2 of V-type proton ATPase catalytic subunit A	ATP6V1A	1	3			1	2
P54116	95403	Erythrocyte band 7 integral membrane protein	STOM				6	1	1	X
P55264-2	NA	Isoform Short of Adenosine kinase	ADK		2			1	1
P56480	107801	ATP synthase subunit beta, mitochondrial	ATP5B		15			1	1
P59999	1915339	Actin-related protein 2/3 complex subunit 4	ARPC4		2			1	1
P60122	1928760	RuvB-like 1	RUVBL1		2			1	1
P60229	99257	Eukaryotic translation initiation factor 3 subunit E	EIF3E		6			1	1
P60335	1345635	Poly(rC)-binding protein 1	PCBP1		2			1	1
P60766	106211	Cell division control protein 42 homolog	CDC42		2			1	1
P60843	95303	Eukaryotic initiation factor 4A-I	EIF4A1		7			1	1
P61027	105066	Ras-related protein Rab-10	RAB10		3			1	1
P61028	2442982	Ras-related protein Rab-8B	RAB8B		4			1	1
P61164	1858964	Alpha-centractin	ACTR1A		4	1		1	2
P61222	1195458	ATP-binding cassette sub-family E member 1	ABCE1		15			1	1
P61971	1915301	Nuclear transport factor 2	NUTF2		2			1	1
P62192	106054	26S protease regulatory subunit 4	PSMC1		9	1		1	2
P62281	1351329	40S ribosomal protein S11	RPS11	1	3	1	1	1	4
P62334	1914339	26S protease regulatory subunit 10B	PSMC6	1	5	1		1	3
P62835	97852	Ras-related protein Rap-1A	RAP1A		2			1	1
P63005	109520	Platelet-activating factor acetylhydrolase IB subunit alpha	PAFAH1B1		6			1	1
P63038	96242	60 kDa heat shock protein, mitochondrial	HSPD1		20			1	1
P63073	95305	Eukaryotic translation initiation factor 4E	EIF4E		3			1	1
P63101	109484	14-3-3 protein zeta/delta	YWHAZ		4			1	1	X
P63330	1321159	Serine/threonine-protein phosphatase 2A catalytic subunit alpha isoform	PPP2CA	1	6			1	2
P68033	87905	Actin, alpha cardiac muscle 1	ACTC1		6			1	1
P68254-2	NA	Isoform 2 of 14-3-3 protein theta	YWHAQ		6			1	1	X
P68373	1095409	Tubulin alpha-1C chain	TUBA1C	6				1	1
P70168	107532	Importin subunit beta-1	KPNB1		15			1	1
P70195	107637	Proteasome subunit beta type-7	PSMB7		7			1	1
P80313	107184	T-complex protein 1 subunit eta	CCT7		18			1	1
P80318	104708	T-complex protein 1 subunit gamma	CCT3		24			1	1
P84084	99434	ADP-ribosylation factor 5	ARF5		5			1	1
P97494	104990	Glutamate--cysteine ligase catalytic subunit	GCLC		5			1	1
Q00612	105979	Glucose-6-phosphate 1-dehydrogenase X	G6PDX		13			1	1
Q05915	95675	GTP cyclohydrolase 1	GCH1		2			1	1
Q05CH9	2148796	E3 ubiquitin-protein ligase RNF123 (Fragment)	RNF123		2			1	1
Q07797	99554	Galectin-3-binding protein	LGALS3BP		5			1	1
Q08879-2	NA	Isoform C of Fibulin-1	FBLN1			2	1	1	2
Q3THK7	2448526	GMP synthase [glutamine-hydrolyzing]	GMPS		2			1	1
Q3TPM3	1349658	Cullin-1 (Fragment)	CUL1		2			1	1
Q3TWV4	1298405	AP-2 complex subunit mu	AP2M1		6			1	1
Q3U0A6	3613460	Protein Hbq1b	HBQ1B		3			1	1
Q3UDE2	3039573	Tubulin--tyrosine ligase-like protein 12	TTLL12		13	1		1	2
Q3UW66	2179733	Sulfurtransferase	MPST		7	1		1	2
Q504P4	105384	Heat shock cognate 71 kDa protein	HSPA8			5		1	1	X
Q5NC80	97355	Nucleoside diphosphate kinase (Fragment)	NME1		2			1	1
Q5SSH7-2	NA	Isoform 2 of Zinc finger ZZ-type and EF-hand domain-containing protein 1	ZZEF1		7			1	1
Q61024	108087	Asparagine synthetase [glutamine-hydrolyzing]	ASNS		3			1	1
Q61035	106188	Histidine--tRNA ligase, cytoplasmic	HARS		4			1	1
Q61166	109486	Microtubule-associated protein RP/EB family member 1	MAPRE1		2			1	1
Q61171	1342292	Peroxiredoxin-2	PRDX2		6			1	1
Q61316	99448	Heat shock 70 kDa protein 4	HSPA4		6			1	1
Q61635	NA	GTP-binding protein	IFI47		4	1		1	2
Q61699-2	NA	Isoform HSP105-beta of Heat shock protein 105 kDa	HSPH1		4	1		1	2
Q61753	1355330	D-3-phosphoglycerate dehydrogenase	PHGDH		4			1	1
Q61838	87854	Alpha-2-macroglobulin	A2M		3			1	1
Q64339	1855694	Ubiquitin-like protein ISG15	ISG15		4			1	1
Q64674	102690	Spermidine synthase	SRM		4			1	1
Q64737	95654	Trifunctional purine biosynthetic protein adenosine-3	GART		4			1	1
Q68FD5	2388633	Clathrin heavy chain 1	CLTC		49			1	1	X
Q6GQT1	2449119	Alpha-2-macroglobulin-P	A2MP		3			1	1
Q6P1B1	2180003	Xaa-Pro aminopeptidase 1	XPNPEP1		8			1	1
Q6ZQ38	1261820	Cullin-associated NEDD8-dissociated protein 1	CAND1		17			1	1
Q6ZWZ6	98105	40S ribosomal protein S12	RPS12		2			1	1
Q76MZ3	1926334	Serine/threonine-protein phosphatase 2A 65 kDa regulatory subunit A alpha isoform	PPP2R1A		10			1	1
Q7TMM9	107861	Tubulin beta-2A chain	TUBB2A		17			1	1
Q7TMY8-2	NA	Isoform 2 of E3 ubiquitin-protein ligase HUWE1	HUWE1		2			1	1
Q80T06	1913906	Elongation factor 1-delta	EEF1D		9			1	1
Q8BGE6	1913865	Cysteine protease ATG4B	ATG4B		2			1	1
Q8BGQ7	2384560	Alanine--tRNA ligase, cytoplasmic	AARS		8			1	1
Q8BHL8	1346072	Proteasome inhibitor PI31 subunit	PSMF1		3			1	1
Q8BJY1	1914248	26S proteasome non-ATPase regulatory subunit 5	PSMD5		6			1	1
Q8BKC5	1917822	Importin-5	IPO5		16			1	1
Q8BP47	1917473	Asparagine--tRNA ligase, cytoplasmic	NARS		8			1	1
Q8BTU6	106906	Eukaryotic initiation factor 4A-II	EIF4A2	2				1	1
Q8BTZ7	2660880	Mannose-1-phosphate guanyltransferase beta	GMPPB		4			1	1
Q8BWT1	1098623	3-ketoacyl-CoA thiolase, mitochondrial	ACAA2		3			1	1
Q8BZW8	1914116	NHL repeat-containing protein 2	NHLRC2		2			1	1
Q8CAA7	1918224	Glucose 1,6-bisphosphate synthase	PGM2L1		2			1	1
Q8CGC7	97838	Bifunctional glutamate/proline--tRNA ligase	EPRS		5		1	1	2
Q8CIH9	2387203	Amidophosphoribosyltransferase	PPAT		7			1	1
Q8JZQ9	106478	Eukaryotic translation initiation factor 3 subunit B	EIF3B		12			1	1
Q8K0E8	99501	Fibrinogen beta chain	FGB		8			1	1
Q8K1B8	2147790	Fermitin family homolog 3	FERMT3		3			1	1
Q8K1M6-4	NA	Isoform 4 of Dynamin-1-like protein	DNM1L		2			1	1
Q8K274	2679256	Ketosamine-3-kinase	FN3KRP		7	1		1	2
Q8R016	1345186	Bleomycin hydrolase	BLMH		8			1	1
Q8R5H1-5	NA	Isoform 5 of Ubiquitin carboxyl-terminal hydrolase 15	USP15		11			1	1
Q8VCM7	95526	Fibrinogen gamma chain	FGG		14			1	1
Q8VDD5	107717	Myosin-9	MYH9	1	4			1	2
Q8VDM4	1096584	26S proteasome non-ATPase regulatory subunit 2	PSMD2		18			1	1
Q91WK2	1915385	Eukaryotic translation initiation factor 3 subunit H	EIF3H		3	1		1	2
Q922B2	2442544	Aspartate--tRNA ligase, cytoplasmic	DARS		5			1	1
Q922D4-4	NA	Isoform 4 of Serine/threonine-protein phosphatase 6 regulatory subunit 3	PPP6R3		5			1	1
Q922D8	1342005	C-1-tetrahydrofolate synthase, cytoplasmic	MTHFD1	4	1	1		1	3
Q923D2	2385271	Flavin reductase (NADPH)	BLVRB		6		1	1	2
Q99J77	2149820	N-acetylneuraminic acid synthase (Sialic acid synthase)	NANS		2			1	1
Q99JI4	1913663	26S proteasome non-ATPase regulatory subunit 6	PSMD6		7			1	1
Q99K47	1316726	Fibrinogen, alpha polypeptide	FGA		2			1	1
Q99MN1	1934754	Lysine--tRNA ligase	KARS		5			1	1
Q9CPU0	95742	Lactoylglutathione lyase	GLO1		3			1	1
Q9CPY7-2	NA	Isoform 2 of Cytosol aminopeptidase	LAP3		5			1	1
Q9CR57	1914365	60S ribosomal protein L14	RPL14		2			1	1
Q9CWJ9	1351352	Bifunctional purine biosynthesis protein PURH	ATIC	1	4	1		1	3
Q9CY02	2158492	Alpha-hemoglobin-stabilizing protein	AHSP				2	1	1
Q9CY58-3	NA	Isoform 3 of Plasminogen activator inhibitor 1 RNA-binding protein	SERBP1				7	1	1
Q9CZ30-2	NA	Isoform 2 of Obg-like ATPase 1	OLA1		3			1	1
Q9CZN7	1277989	Serine hydroxymethyltransferase	SHMT2		9			1	1
Q9CZU6	88529	Citrate synthase, mitochondrial	CS		3			1	1
Q9D0R2	106314	Threonine--tRNA ligase, cytoplasmic	TARS		12			1	1
Q9D358	87881	Low molecular weight phosphotyrosine protein phosphatase	ACP1		3			1	1
Q9D8E6	1915141	60S ribosomal protein L4	RPL4		1		3	1	2
Q9D8W5	1914247	26S proteasome non-ATPase regulatory subunit 12	PSMD12		4			1	1
Q9DB05	104563	Alpha-soluble NSF attachment protein	NAPA		7			1	1
Q9DCH4	1913335	Eukaryotic translation initiation factor 3 subunit F	EIF3F		5		1	1	2
Q9DCL9	1914304	Multifunctional protein ADE2	PAICS		6			1	1
Q9ER35	1926834	Fructosamine-3-kinase	FN3K		3			1	1
Q9JHU4	103147	Cytoplasmic dynein 1 heavy chain 1	DYNC1H1		4	1		1	2
Q9JKX6	1858232	ADP-sugar pyrophosphatase	NUDT5		2			1	1
Q9JLJ2	1861622	4-trimethylaminobutyraldehyde dehydrogenase	ALDH9A1		7			1	1
Q9QUM9	1347006	Proteasome subunit alpha type-6	PSMA6		9			1	1
Q9QUR6	1270863	Prolyl endopeptidase	PREP		3			1	1
Q9QYB8-2	NA	Isoform 2 of Beta-adducin	ADD2		2			1	1
Q9QYC0-2	NA	Isoform 2 of Alpha-adducin	ADD1		4			1	1
Q9QZD9	1860763	Eukaryotic translation initiation factor 3 subunit I	EIF3I		6			1	1
Q9R0P3	95421	S-formylglutathione hydrolase	ESD		11			1	1
Q9R0Q6	1928896	Actin-related protein 2/3 complex subunit 1A	ARPC1A		2			1	1
Q9R111	95678	Guanine deaminase	GDA		3			1	1
Q9R1P1	1347014	Proteasome subunit beta type-3	PSMB3		8			1	1
Q9R1P3	1347045	Proteasome subunit beta type-2	PSMB2		9			1	1
Q9R1P4	1347005	Proteasome subunit alpha type-1	PSMA1		15			1	1
Q9WUA2	1346035	Phenylalanine--tRNA ligase beta subunit	FARSB		8			1	1
Q9Z1Q5	2148924	Chloride intracellular channel protein 1	CLIC1		4			1	1
Q9Z1Z2	1329037	Serine-threonine kinase receptor-associated protein	STRAP		10	1		1	2
Q9Z2U0	1347070	Proteasome subunit alpha type-7	PSMA7		12			1	1
Q9Z2U1	1347009	Proteasome subunit alpha type-5	PSMA5		11			1	1
S4R1E5	104767	Glutathione peroxidase	NA		4			1	1
S4R1N1	1927636	60S acidic ribosomal protein P0 (Fragment)	RPLP0			2	1	1	2
S4R1N6	98146	40S ribosomal protein S18	NA	1	3			1	2
A1BN54	2137706	Alpha actinin 1a	ACTN1		1			0	1
A2A547	98020	Ribosomal protein L19	RPL19				1	0	1
A2A6F8	1929455	60S ribosomal protein L23 (Fragment)	RPL23		1		1	0	2
A2A701	1351744	Eukaryotic translation initiation factor 3 subunit M (Fragment)	EIF3M			1		0	1
A2A839	95401	Protein 4.1	EPB4.1			1		0	1
A2AKV0	1261437	ATP synthase subunit gamma, mitochondrial (Fragment)	ATP5C1		1			0	1
A2AN08-2	NA	Isoform 2 of E3 ubiquitin-protein ligase UBR4	UBR4		1			0	1
A2AQB2	97292	Protein Neb	NEB			1		0	1
A2AWQ2	1919784	Protein RCC2 (Fragment)	RCC2		1			0	1
A2BH06	1914275	60S ribosomal protein L11 (Fragment)	RPL11				1	0	1
B1ARA3	106022	60S ribosomal protein L26 (Fragment)	RPL26				1	0	1
B1ARS0	88262	Adenylyl cyclase-associated protein (Fragment)	CAP1		1			0	1
B1AY86	1914698	Plexin domain-containing protein 2	PLXDC2		1			0	1
B7FAV1	95556	Filamin, alpha (Fragment)	FLNA			1		0	1
B7ZCL9	105941	55 kDa erythrocyte membrane protein (Fragment)	MPP1		1			0	1
B8JKK2	1913730	Ribosomal protein L15 (Fragment)	RPL15			1		0	1
D3YTP0	1915678	Metalloreductase STEAP3 (Fragment)	STEAP3				1	0	1
D3YU32	2685208	Protein Gm362	GM362		1			0	1
D3YU75	104890	Translationally-controlled tumor protein	TPT1		1			0	1
D3YUG3	1333780	40S ribosomal protein S19 (Fragment)	RPS19				1	0	1
D3YV43	1350917	40S ribosomal protein S3	RPS3			1	1	0	2
D3YVE6	NA	MCG18601	RPL7A-PS10				1	0	1
D3YVF4	98107	40S ribosomal protein S14 (Fragment)	RPS14			1		0	1
D3YVH7	894684	Proliferation-associated protein 2G4 (Fragment)	PA2G4	1				0	1
D3YW60	1928760	RuvB-like 1 (Fragment)	RUVBL1			1		0	1
D3YWB3	2669035	Transmembrane channel-like protein	TMC4		1			0	1
D3YX47	NA	MCG20932	RPL21-PS6		1		1	0	2
D3YX54	NA	60S ribosomal protein L13	RPL13-PS3		1		1	0	2
D3YY61	NA	MCG18643	RPL13A-PS1	1				0	1
D3YYH3	1098242	Phosphoglycerate mutase (Fragment)	BPGM	1				0	1
D3YZ71	102776	AP-1 complex subunit mu-1 (Fragment)	AP1M1		1			0	1
D3YZF6	3651059	Protein Gm12429	GM12429		1			0	1
D3Z0A2	107846	Protein arginine N-methyltransferase 1	PRMT1			1		0	1
D3Z0F6	2182607	Serine dehydratase-like (Fragment)	SDSL		1			0	1
D3Z1E6	109548	Disintegrin and metalloproteinase domain-containing protein 10 (Fragment)	ADAM10			1		0	1
D3Z1U9	107851	NADH dehydrogenase [ubiquinone] flavoprotein 1, mitochondrial	NDUFV1		1			0	1
D3Z1Z4	1346861	Mitogen-activated protein kinase 8	MAPK8		1			0	1
D3Z2N7	1925638	V-type proton ATPase 16 kDa proteolipid subunit (Fragment)	MVP				1	0	1
D3Z4A4	109486	Peroxiredoxin-2 (Fragment)	PRDX2				1	0	1
D3Z4D8	1926116	BRISC complex subunit Abro1 (Fragment)	FAM175B		1			0	1
D3Z712	2389091	40S ribosomal protein S15a (Fragment)	RPS15A				1	0	1
D3Z7C6	1929282	Prostaglandin E synthase 3	PTGES3	1		1		0	2
D3Z7F0	96763	L-lactate dehydrogenase (Fragment)	LDHB	1				0	1
D6RIJ2	1913840	Phenylalanine--tRNA ligase alpha subunit	FARSA	1				0	1
E0CXE3	1858223	Contactin-6	CNTN6			1		0	1
E0CYN1	1097686	Histone H3.3 (Fragment)	H3F3A		1			0	1
E0CZ90	1096365	Proteasome activator complex subunit 2 (Fragment)	PSME2		1			0	1
E9PUX4	3647789	60S ribosomal protein L6	GM5428				1	0	1
E9PVG8	2442118	Protein 9530053A07Rik	9530053A07RIK			1		0	1
E9PX03	1345964	Coronin	CORO1C		1			0	1
E9PXX5	2444559	Mitogen-activated protein kinase 4	MAPK4		1			0	1
E9PYG9	1927468	Deoxynucleoside triphosphate triphosphohydrolase SAMHD1	SAMHD1		1			0	1
E9PZC4	2385271	Flavin reductase (NADPH)	BLVRB	1		1		0	2
E9Q0U1	1345192	26S proteasome non-ATPase regulatory subunit 13	PSMD13			1		0	1
E9Q132	NA	60S ribosomal protein L24	RPL24		1			0	1
E9Q1J7	1914154	Propionyl-CoA carboxylase beta chain, mitochondrial	PCCB		1			0	1
E9Q242	103202	Adenylosuccinate lyase	ADSL		1			0	1
E9Q3D6	96247	Heat shock protein HSP 90-beta (Fragment)	HSP90AB1				1	0	1
E9Q3T0	3641908	Uncharacterized protein	GM10073	1			1	0	2
E9Q3U1	104632	Ubiquitin-conjugating enzyme E2 H	UBE2H		1			0	1
E9Q4T8	1347360	Cullin-3	CUL3		1			0	1
E9Q6D3	2685601	Protein Ccdc121	CCDC121			1		0	1
E9Q6P1	2183441	Phosphoserine aminotransferase (Fragment)	PSAT1		1			0	1
E9Q8I9-3	NA	Isoform 3 of Protein furry homolog	FRY		1			0	1
E9QAN8	2685045	Protein Pik3c2b	PIK3C2B			1		0	1
F6Q2E3	1098754	26S protease regulatory subunit 6A (Fragment)	PSMC3	1				0	1
F6QL70	4937303	Protein Gm17669	GM17669				1	0	1
F6RQF0	1916998	Aldehyde dehydrogenase family 16 member A1 (Fragment)	ALDH16A1			1		0	1
F6SAC3	3037698	Glucose-6-phosphate isomerase	GM1840			1		0	1
F6SDD7	1333803	DNA topoisomerase (Fragment)	TOP3B		1			0	1
F6SVV1	3779903	Protein Gm9493	GM9493		1		1	0	2
F6T867	98419	Sorcin (Fragment)	SRI		1			0	1
F6XMY4	107368	Transcription elongation factor A protein 2 (Fragment)	TCEA2		1			0	1
F6YCA7	1349409	COP9 signalosome complex subunit 3 (Fragment)	COPS3		1			0	1
F6Z1E7	1920995	Ubiquitin-associated domain-containing protein 1 (Fragment)	UBAC1		1			0	1
F7A4U8	1355272	Casein kinase I isoform delta (Fragment)	CSNK1D		1			0	1
F7AL76	1915022	Chromodomain-helicase-DNA-binding protein 8 (Fragment)	CHD8		1			0	1
F8WIE5	2384768	E3 ubiquitin-protein ligase HECTD1	HECTD1		1			0	1
G3UWE8	1196620	Hepsin, isoform CRA_c	HPN	1				0	1
G3UX28	98003	60S ribosomal protein L18 (Fragment)	RPL18				1	0	1
G3UX97	2385906	Paraplegin (Fragment)	SPG7		1			0	1
G3UXY0	1096367	Proteasome activator complex subunit 1	PSME1		1			0	1
G3UY11	88024	Ankyrin-1	ANK1			1		0	1
G3UYV6	98003	60S ribosomal protein L18 (Fragment)	RPL18	1				0	1
G3UYV7	1859516	40S ribosomal protein S28 (Fragment)	RPS28				1	0	1
G3UZ28	1916327	26S proteasome non-ATPase regulatory subunit 11 (Fragment)	PSMD11	1				0	1
G3UZ33	1916327	26S proteasome non-ATPase regulatory subunit 11 (Fragment)	PSMD11			1		0	1
G3UZP6	1289252	Serine/threonine-protein phosphatase 2A 55 kDa regulatory subunit B delta isoform (Fragment)	PPP2R2D		1			0	1
G3X9D5	2448413	Histone H2B type 2-B	HIST2H2BB				1	0	1
H3BJ70	2446630	Protein argonaute-1 (Fragment)	AGO1			1		0	1
H7BWZ3	1928375	Actin-related protein 2/3 complex subunit 3	ARPC3		1			0	1
I7HLV2	105943	60S ribosomal protein L10 (Fragment)	RPL10				1	0	1
J3QJU7	3649529	Progressive rod-cone degeneration protein homolog	GM11744		1			0	1
J3QMT0	2138741	Heterogeneous nuclear ribonucleoprotein F (Fragment)	HNRNPF		1			0	1
J3QN06	1913353	ATP-dependent (S)-NAD(P)H-hydrate dehydratase	CARKD		1			0	1
J3QPS8	106248	Eukaryotic translation initiation factor 5A-1	EIF5A				1	0	1
J3QPZ5	3779542	Protein Ccdc42b	CCDC42B		1			0	1
O08573-2	NA	Isoform Short of Galectin-9	LGALS9		1			0	1
O35350	88263	Calpain-1 catalytic subunit	CAPN1		1			0	1
O35490	1339972	Betaine--homocysteine S-methyltransferase 1	BHMT	1				0	1
O89053	1345961	Coronin-1A	CORO1A		1			0	1
P01896	NA	H-2 class I histocompatibility antigen, alpha chain (Fragment)	1			1		0	1
P05132-2	NA	Isoform 2 of cAMP-dependent protein kinase catalytic subunit alpha	PRKACA		1			0	1
P08003	104864	Protein disulfide-isomerase A4	PDIA4	1				0	1
P10605	88561	Cathepsin B	CTSB		1			0	1
P14131	98118	40S ribosomal protein S16	RPS16			1		0	1
P14152	97051	Malate dehydrogenase, cytoplasmic	MDH1		1			0	1
P14211	88252	Calreticulin	CALR		1			0	1
P16301	96755	Phosphatidylcholine-sterol acyltransferase	LCAT		1	1		0	2
P24527	96836	Leukotriene A-4 hydrolase	LTA4H		1			0	1
P27005	88244	Protein S100-A8	S100A8		1			0	1
P27773	95834	Protein disulfide-isomerase A3	PDIA3		1			0	1
P31725	1338947	Protein S100-A9	S100A9				1	0	1
P31938	1346866	Dual specificity mitogen-activated protein kinase kinase 1	MAP2K1		1			0	1
P34884	96982	Macrophage migration inhibitory factor	MIF		1	1		0	2
P40237	104651	CD82 antigen	CD82	1				0	1	X
P43431	96539	Interleukin-12 subunit alpha	IL12A			1		0	1
P47911	108057	60S ribosomal protein L6	RPL6		1			0	1
P51174	87866	Long-chain specific acyl-CoA dehydrogenase, mitochondrial	ACADL		1			0	1
P55937-1	NA	Isoform 1 of Golgin subfamily A member 3	GOLGA3		1			0	1
P60670-2	NA	Isoform 2 of Nuclear protein localization protein 4 homolog	NPLOC4		1			0	1
P60867	1914677	40S ribosomal protein S20	RPS20		1			0	1
P61358	98036	60S ribosomal protein L27	RPL27		1			0	1
P62743	2141861	AP-2 complex subunit sigma	AP2S1		1			0	1
P62849-2	NA	Isoform 2 of 40S ribosomal protein S24	RPS24				1	0	1
P62889	98037	60S ribosomal protein L30	RPL30		1		1	0	2
P63037	1270129	DnaJ homolog subfamily A member 1	DNAJA1		1			0	1
Q02013	103201	Aquaporin-1	AQP1				1	0	1	X
Q06890	88423	Clusterin	CLU		1	1		0	2
Q09143	88117	High affinity cationic amino acid transporter 1	SLC7A1				1	0	1
Q31093	95915	Histocompatibility 2, M region locus 3	H2-M3		1			0	1
Q3TIR6	1333804	Prefoldin subunit 3	VBP1		1			0	1
Q3TIU4	2443226	2p,5p-phosphodiesterase 12	PDE12		1			0	1
Q3TPL3	98917	Uroporphyrinogen III synthase, isoform CRA_b	UROS		1			0	1
Q3U4W8	1347343	Ubiquitin carboxyl-terminal hydrolase	USP5		1			0	1
Q3U5Q7	99830	UMP-CMP kinase 2, mitochondrial	CMPK2		1			0	1
Q3UEJ6	97829	Phosphorylase	PYGL		1			0	1
Q3UV95	95402	Erythrocyte membrane protein band 4.2	EPB4.2			1		0	1
Q3UZZ4	2685142	Olfactomedin-4	OLFM4		1			0	1
Q5SSW2	2143994	Proteasome activator complex subunit 4	PSME4		1			0	1
Q5SW19-3	97549	Isoform 3 of Clustered mitochondria protein homolog	CLUH		1			0	1
Q5SX49	104880	Profilin	PFN1	1				0	1
Q60972	1350929	Histone-binding protein RBBP4	RBBP4		1			0	1
Q61133	891995	Glutathione S-transferase theta-2	GSTT2		1			0	1
Q61474-2	NA	Isoform 2 of RNA-binding protein Musashi homolog 1	MSI1			1		0	1
Q64514-2	NA	Isoform Short of Tripeptidyl-peptidase 2	TPP2				1	0	1
Q64669	103187	NAD(P)H dehydrogenase [quinone] 1	NQO1		1			0	1
Q68FL6	1345633	Methionine--tRNA ligase, cytoplasmic	MARS		1			0	1
Q6PGB6-3	NA	Isoform 3 of N-alpha-acetyltransferase 50	NAA50		1			0	1
Q6ZPQ6-2	NA	Isoform 2 of Membrane-associated phosphatidylinositol transfer protein 2	PITPNM2			1		0	1
Q6ZWN5	1924096	40S ribosomal protein S9	RPS9				1	0	1
Q792Z1	3687012	MCG140784	TRY10	1	1	1		0	3
Q7TPM3	1861440	E3 ubiquitin-protein ligase TRIM17	TRIM17		1			0	1
Q80ZV3	1891207	Proline synthase co-transcribed bacterial homolog protein	PROSC		1			0	1
Q8BFY6	1915148	Peflin	PEF1		1			0	1
Q8BGY2	1933735	Eukaryotic translation initiation factor 5A-2	EIF5A2		1			0	1
Q8BK06-2	NA	Isoform 2 of F-box only protein 9	FBXO9		1			0	1
Q8BWP8-2	NA	Isoform 2 of N-acetyllactosaminide beta-1,3-N-acetylglucosaminyltransferase	B3GNT1			1		0	1
Q8C1A5	1354165	Thimet oligopeptidase	THOP1		1			0	1
Q8C2S3	103067	Transcriptional regulator ATRX (Fragment)	ATRX		1			0	1
Q8C5H8-2	NA	Isoform 2 of NAD kinase 2, mitochondrial	NADK2		1			0	1
Q8CB27	2442596	Ubiquitin thioesterase OTU1	YOD1		1			0	1
Q8CG76	107796	Aflatoxin B1 aldehyde reductase member 2	AKR7A2		1			0	1
Q8CI75	2442555	DIS3-like exonuclease 2	DIS3L2		1			0	1
Q8K0T7	2149021	Protein unc-13 homolog C	UNC13C				1	0	1
Q8K1K2	105047	26S protease regulatory subunit 8	PSMC5	1				0	1
Q8K411-3	NA	Isoform 3 of Presequence protease, mitochondrial	PITRM1		1			0	1
Q8VBV7	1915363	COP9 signalosome complex subunit 8	COPS8		1			0	1
Q8VE73-3	NA	Isoform 2 of Cullin-7	CUL7		1			0	1
Q8VI93	2180850	2p-5p-oligoadenylate synthase 3	OAS3		1			0	1
Q91VD9	2443241	NADH-ubiquinone oxidoreductase 75 kDa subunit, mitochondrial	NDUFS1		1			0	1
Q91XF0	2144151	Pyridoxine-5p-phosphate oxidase	PNPO		1	1		0	2
Q91Z40	2444421	Gbp6 protein	GBP7		1			0	1
Q99L27	1917903	GMP reductase 2	GMPR2		1			0	1
Q99LD4	2384801	COP9 signalosome complex subunit 1	GPS1		1			0	1
Q99PG2-2	NA	Isoform 2 of Opioid growth factor receptor	OGFR		1			0	1
Q9CPN9	1914623	Protein 2210010C04Rik	2210010C04RIK	1	1	1		0	3
Q9CQ09	1913461	Protein Rpl3l	RPL3L				1	0	1
Q9CY64	88170	Biliverdin reductase A	BLVRA		1			0	1
Q9CYK1	1917810	Tryptophan--tRNA ligase, mitochondrial	WARS2		1		1	0	2
Q9D051	1915513	Pyruvate dehydrogenase E1 component subunit beta, mitochondrial	PDHB		1			0	1
Q9D0B6-2	NA	Isoform 2 of Protein PBDC1	PBDC1		1			0	1
Q9D1P4	1914167	Cysteine and histidine-rich domain-containing protein 1	CHORDC1		1			0	1
Q9DBH0	1914144	NEDD4-like E3 ubiquitin-protein ligase WWP2	WWP2				1	0	1
Q9DBZ5-2	NA	Isoform 2 of Eukaryotic translation initiation factor 3 subunit K	EIF3K		1			0	1
Q9DC71	1913657	28S ribosomal protein S15, mitochondrial	MRPS15			1		0	1
Q9DCD0	97553	6-phosphogluconate dehydrogenase, decarboxylating	PGD		1			0	1
Q9ER72-2	NA	Isoform 2 of Cysteine--tRNA ligase, cytoplasmic	CARS		1			0	1
Q9EST4-3	NA	Isoform 3 of Proteasome assembly chaperone 2	PSMG2		1			0	1
Q9JHH6	1891837	Carboxypeptidase B2	CPB2			1		0	1
Q9JL16-2	NA	Isoform 2 of Interferon-stimulated gene 20 kDa protein	ISG20		1			0	1
Q9JLC8-2	NA	Isoform 2 of Sacsin	SACS			1		0	1
Q9QUK9	102756	MCG15083	TRY5			1		0	1
Q9QUM0	96601	Integrin alpha-IIb	ITGA2B		1			0	1
Q9QUT0	1202713	Ammonium transporter Rh type A	RHAG				1	0	1
Q9Z2W0	1278328	Aspartyl aminopeptidase	DNPEP		1			0	1
S4R232	105071	Ras-related protein Rab-4B	NA			1		0	1
S4R257	95640	Glyceraldehyde-3-phosphate dehydrogenase (Fragment)	NA	1				0	1
S4R295	1351645	Protein arginine N-methyltransferase 5	NA		1			0	1
S4R2M7	97555	Phosphoglycerate kinase	NA		1			0	1
